# Supplementary material for: Assessment of source regions of the Zambezi River: implications for regional water security
Source: Copernicus journal article supplement (doi:10.5194/hess-29-4557-2025), 2025-09-23
Supplement: Supplementary file 1 [file hess-29-4557-2025-supplement.pdf]

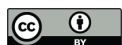

*Supplement of*

## **Assessment of source regions of the Zambezi River: implications for regional water security**

**Mauro Lourenco et al.**

*Correspondence to:* Rainer von Brandis ([rainer@wildbirdtrust.com](mailto:rainer@wildbirdtrust.com))

The copyright of individual parts of the supplement might differ from the article licence.

## 1 Supplement

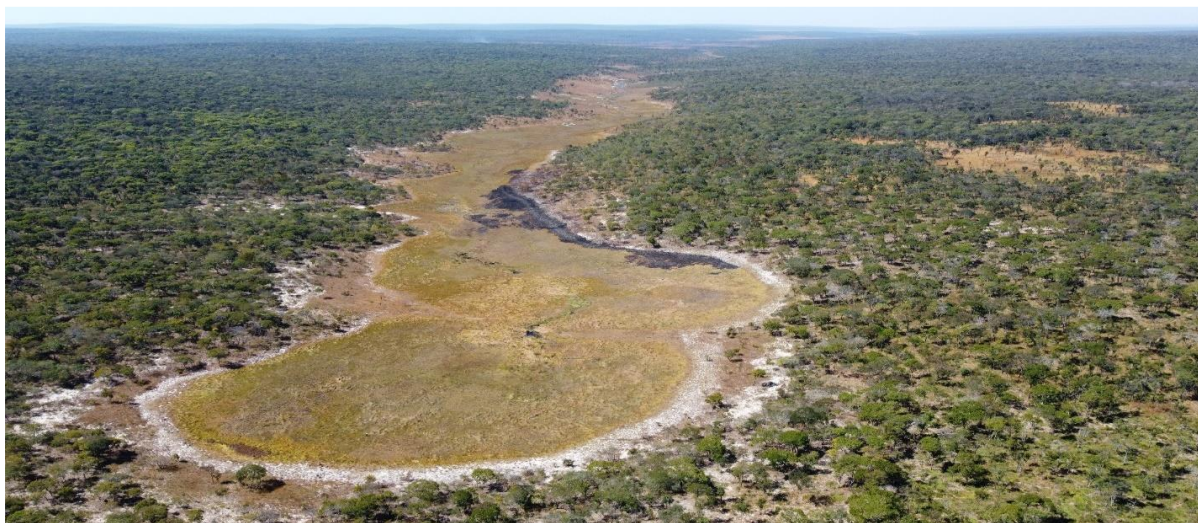

2  
3 **Figure S1.** Source of the Lungwebungu, the most distant tributary to the Zambezi Basin, starts as a small trickle  
4 pouring out of a bowl-shaped peatland bog supported by groundwater.



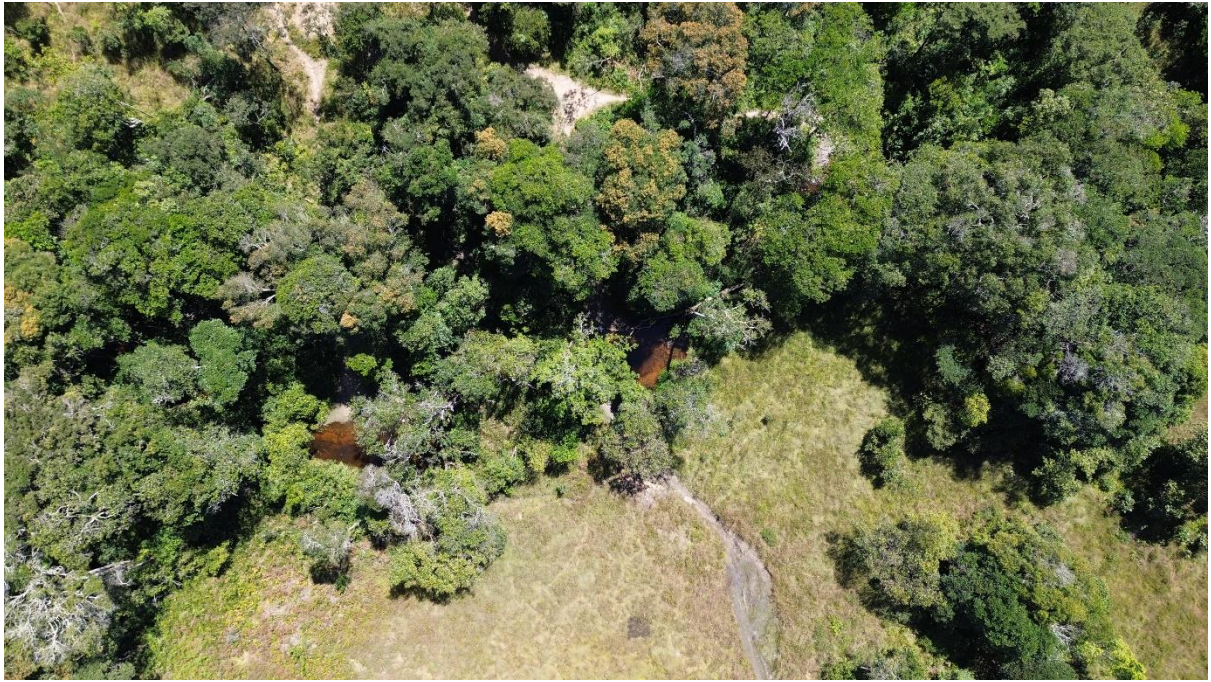

5

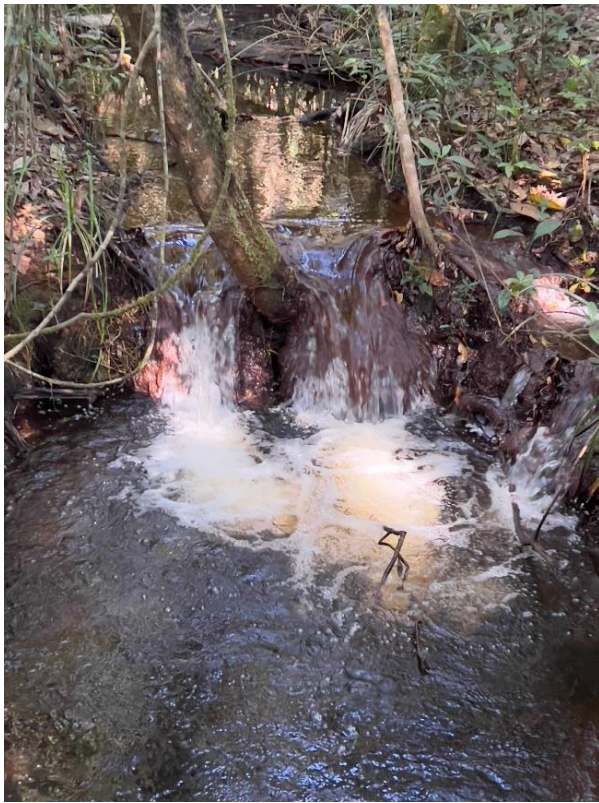

6

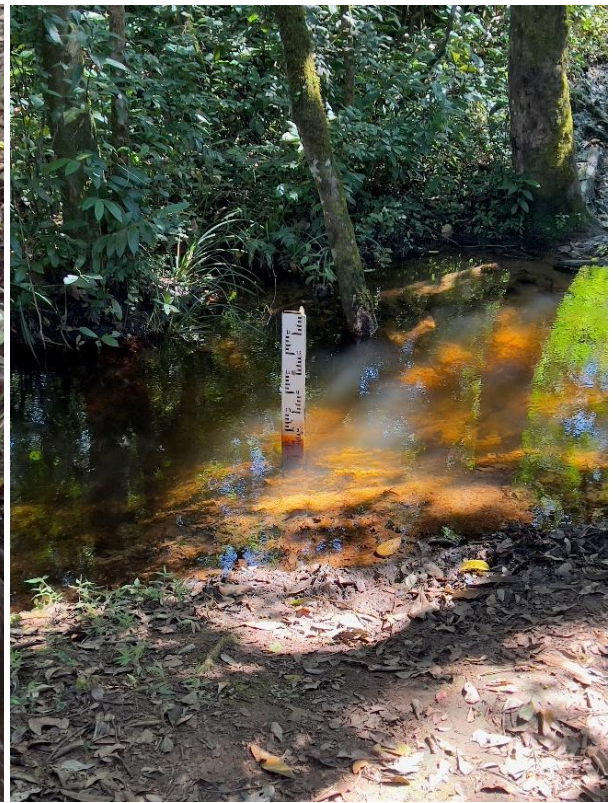

7 **Figure S2.** The traditional source of the Zambezi River originates from a small spring, near Kalene Hill in Zambia.

8



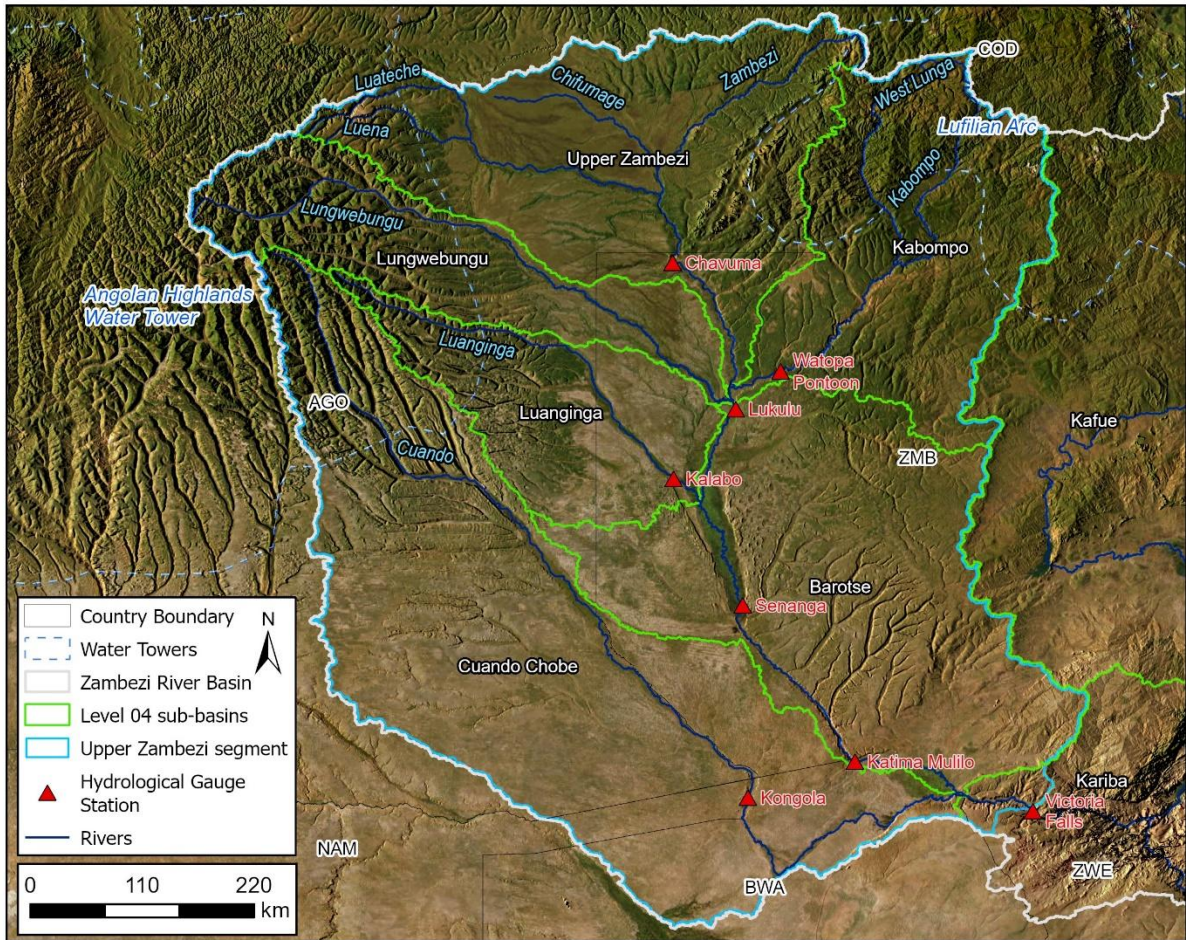

**Figure S3.** The locations of each hydrological gauge station (red triangles) used in comparison with the Collins et al. (2024) and Akpoti et al. (2024) datasets within the Upper Zambezi Segment.

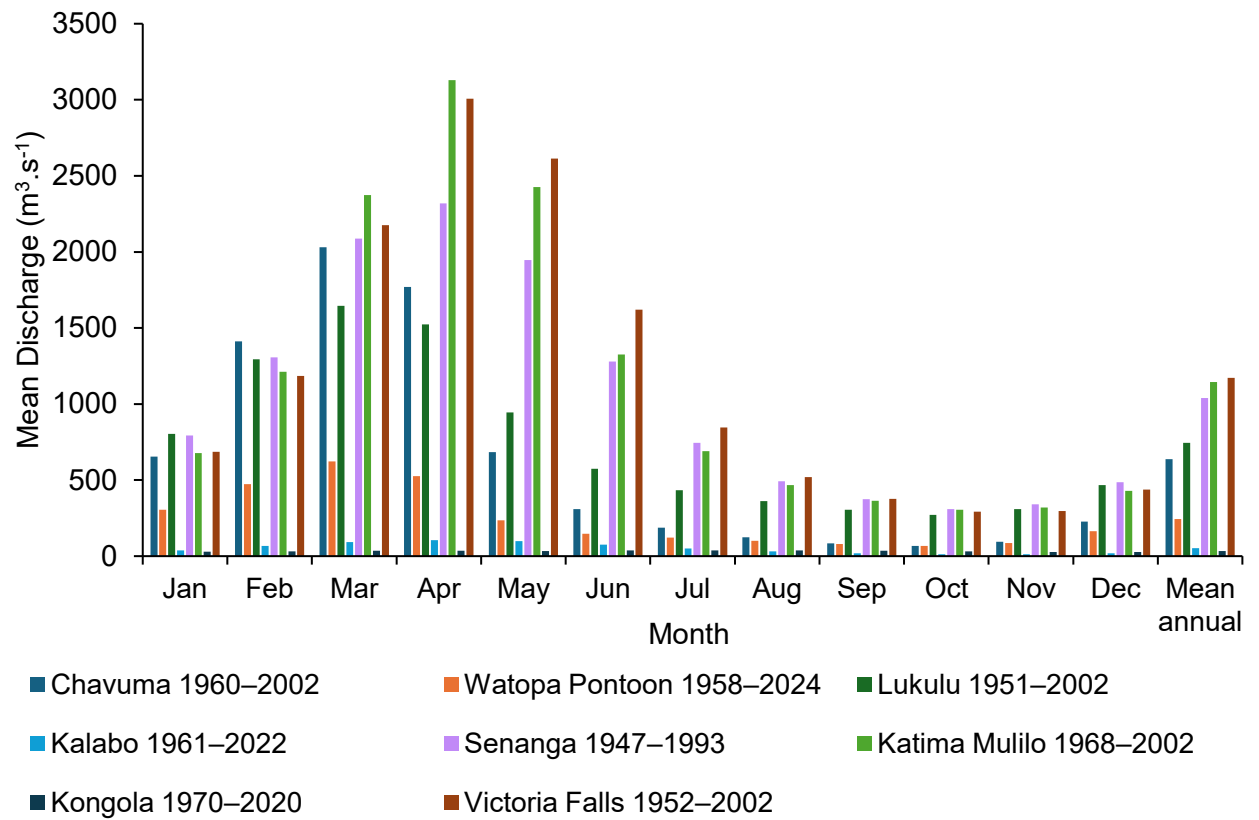

**Figure S4.** The mean monthly discharge over separate time series for each of the eight hydrological gauge stations.

15 **Table S1.** ADCP discharge measurements within the Upper Zambezi segment, listed in chronological order of  
16 sampling

| Site No. | Site description and river names                                      | Q (m <sup>3</sup> .s <sup>-1</sup> ) | Date              |
|----------|-----------------------------------------------------------------------|--------------------------------------|-------------------|
| 1        | Measured along Lungwebungu River                                      | 8.2                                  | 2022/06/07        |
| 2        | Measured along Lungwebungu River                                      | 13.1                                 | 2022/06/10        |
| 3        | Measured along Lungwebungu River                                      | 21.5                                 | 2022/06/11        |
| 4        | Measured along Lungwebungu River                                      | 36.8                                 | 2022/06/16        |
| 5        | Measured along Lungwebungu River                                      | 55.6                                 | 2022/06/19        |
| 6        | Measured along Lungwebungu River                                      | 81.1                                 | 2022/06/23        |
| 7        | Measured along Lungwebungu River                                      | 86.8                                 | 2022/06/26        |
| 8        | Measured along Lungwebungu River                                      | 90.5                                 | 2022/07/01        |
| 9        | Measured along Lungwebungu River                                      | 104.9                                | 2022/07/04        |
| 10       | Measured along Luanginga River                                        | 14.1                                 | 2022/07/05        |
| 11       | Measured along Lungwebungu River                                      | 201.4                                | 2023/03/04        |
| 12       | Measured along Lungwebungu River                                      | 213.1                                | 2023/03/07        |
| 13       | Measured along Lungwebungu River                                      | 257.8                                | 2023/03/07        |
| 14       | Measured along Lungwebungu River                                      | 288.3                                | 2023/03/08        |
| 15       | <b>Measured at end of Kashiji River confluence with Lungwebungu</b>   | <b>75.6</b>                          | <b>2023/03/10</b> |
| 16       | <b>Measured at end of Lungwebungu confluence with Zambezi</b>         | <b>335.7</b>                         | <b>2023/03/10</b> |
| 17       | Measured along Zambezi River downstream of Lungwebungu                | 1471.1                               | 2023/03/10        |
| 18       | Measured along Cuando River                                           | 29.1                                 | 2023/03/29        |
| 19       | Measured along Cuando River                                           | 24.6                                 | 2023/04/06        |
| 20       | Measured along Cuando River                                           | 23.9                                 | 2023/04/06        |
| 21       | Measured along Zambezi River                                          | 1.6                                  | 2023/05/05        |
| 22       | Measured along Zambezi River                                          | 6.7                                  | 2023/05/06        |
| 23       | Measured along Zambezi River                                          | 16.0                                 | 2023/05/10        |
| 24       | Measured along Zambezi River                                          | 923.4                                | 2023/05/17        |
| 25       | Measured along Zambezi River                                          | 928.6                                | 2023/05/17        |
| 26       | <b>Measured at end of Kabompo, confluence with Zambezi</b>            | <b>318.1</b>                         | <b>2023/05/21</b> |
| 27       | <b>Measured at end of Lungwebungu, confluence with Zambezi</b>        | <b>193.8</b>                         | <b>2023/05/22</b> |
| 28       | Measured along Zambezi River upstream of LB confluence                | 1194.2                               | 2023/05/22        |
| 29       | Measured along Zambezi River upstream of Ngoye Falls                  | 2323.1                               | 2023/05/31        |
| 30       | <b>Measured at end of Jimbe, confluence with Zambezi</b>              | <b>3.6</b>                           | <b>2023/07/07</b> |
| 31       | Measured along Zambezi River                                          | 18.0                                 | 2023/07/08        |
| 32       | Measured along Zambezi River                                          | 26.8                                 | 2023/07/10        |
| 33       | Measured along Zambezi River                                          | 28.5                                 | 2023/07/13        |
| 34       | <b>Measured at the end of smaller Luateche tributary with Zambezi</b> | <b>5.2</b>                           | <b>2023/07/14</b> |
| 35       | <b>Measured at the end of Luisaba River, confluence with Zambezi</b>  | <b>37.7</b>                          | <b>2023/07/16</b> |
| 36       | Measured along Zambezi River                                          | 106.0                                | 2023/07/18        |
| 37       | <b>Measured at the end of Luvua River, confluence with Zambezi</b>    | <b>5.5</b>                           | <b>2023/07/19</b> |
| 38       | <b>Measured at end of Chifumage, confluence with Zambezi</b>          | <b>21.2</b>                          | <b>2023/07/21</b> |
| 39       | <b>Measured at end of Luena, confluence with Zambezi</b>              | <b>72.5</b>                          | <b>2023/07/22</b> |
| 40       | Measured along Zambezi River                                          | 135.4                                | 2023/07/22        |
| 41       | <b>Measured at end of Longonho River, confluence with Zambezi</b>     | <b>1.1</b>                           | <b>2023/07/22</b> |

|           |                                                                  |            |                   |
|-----------|------------------------------------------------------------------|------------|-------------------|
| <b>42</b> | <b>Measured at end of Lumbala River, confluence with Zambezi</b> | <b>3.9</b> | <b>2023/07/23</b> |
| <b>43</b> | <b>Measured at end of Lufuige River, confluence with Zambezi</b> | <b>5.6</b> | <b>2023/07/23</b> |
| 44        | Measured along Zambezi River                                     | 212.8      | 2023/07/24        |
| 45        | Measured along Zambezi River                                     | 579.6      | 2023/07/30        |
| <b>46</b> | <b>Measured at end of Lumbe River, confluence with Zambezi</b>   | <b>5.7</b> | <b>2023/08/01</b> |
| 47        | Measured along Zambezi River                                     | 567.2      | 2023/08/06        |

Supplement Table S1 notes: confluence measurements in bold.



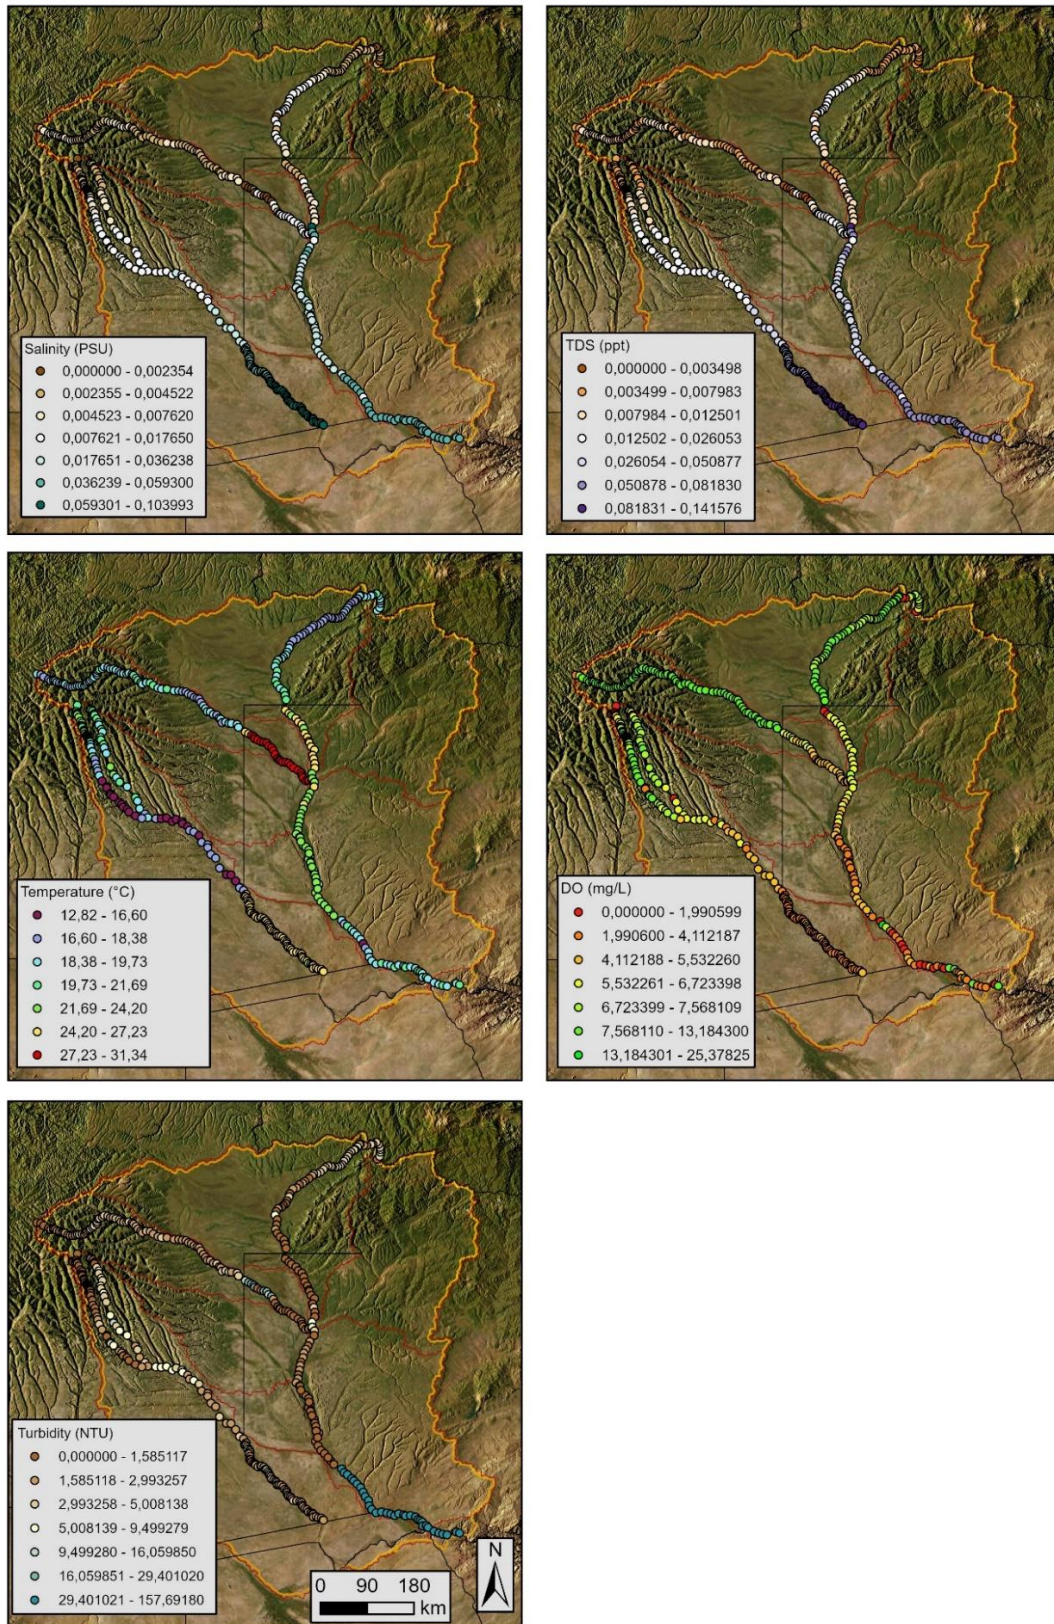

20

21

**Figure S5.** TWP river expedition water quality parameters including salinity, total dissolved solids (TDS),

22

temperature, dissolved oxygen (DO), and turbidity for the Upper Zambezi Segment.



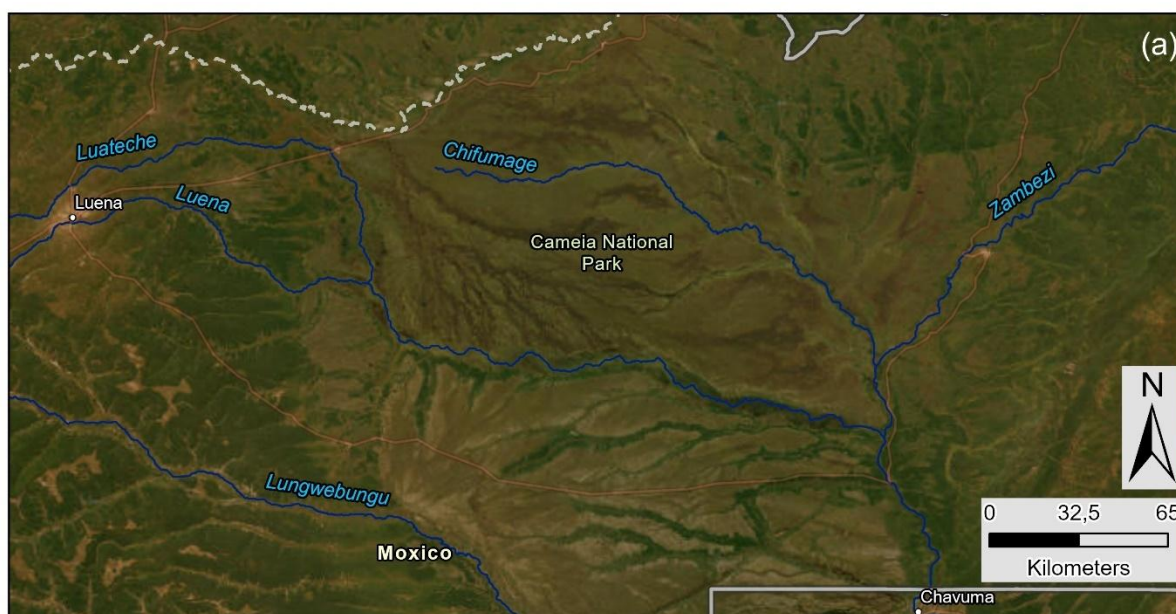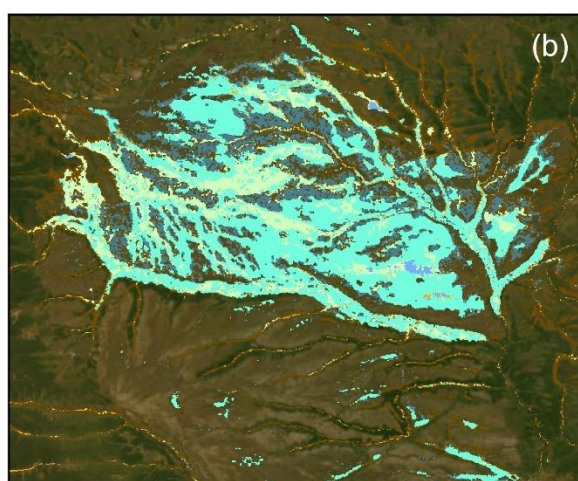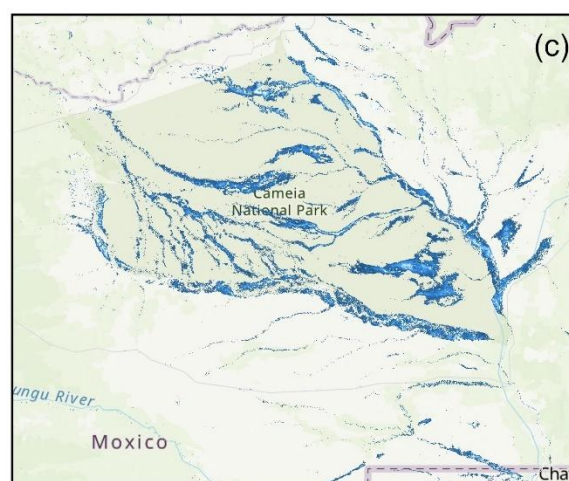

Global Wetland Classification

- Open Water
- Mangroves
- Swamps
- Fens
- Riverine and lacustrine
- Floodouts
- Floodplains
- General Marshes
- Marshes in arid climate
- Marshes wet meadows

JRC Water Occurrence 1984-2021

100  
0

**Figure S6.** (a) Satellite view of the Kameia floodplain region including major rivers of the Upper Zambezi segment, Moxico Province, Angola (source: ESRI World Imagery), (b) CIFOR wetland classification, and (c) JRC water occurrence 1984–2021.
